# Supplementary material for: Competition between maturation and degradation drives human snRNA 3′ end quality control
Source: PubMed Central journal article supplement (PMC7328512; doi:10.1101/gad.336891.120), 2020-07-01
Supplement: supp_gad.336891.120_Supplemental_Data.pdf [file supp_gad.336891.120_Supplemental_Data.pdf]

## **Competition between end maturation and degradation drives human snRNA 3' end quality control**

Rea M. Lardelli and Jens Lykke-Andersen

### **Supplemental Material Titles**

Supplemental Figure S1. Related to Figure 1. Characterization of TOE1-degtron cell lines.

Supplemental Figure S2. Related to Figure 2. snRNAs are tailed and trimmed at early and late steps of snRNA biogenesis.

Supplemental Figure S3. Related to Figure 3. TOE1 depletion causes accumulation of unprocessed adenylated snRNAs with PHAX.

Supplemental Figure S4. Related to Figure 4. snRNAs become targets of the nuclear exosome in the absence of TOE1.

Supplemental Figure S5. Related to Figure 5. TOE1 selectively processes regular U1 snRNA over U1 snRNA variants.

Supplemental Figure S6. Related to Figure 6. U1 variant snRNAs are targets of the nuclear exosome.

Supplemental Table S1. List of DNA and RNA oligos used.

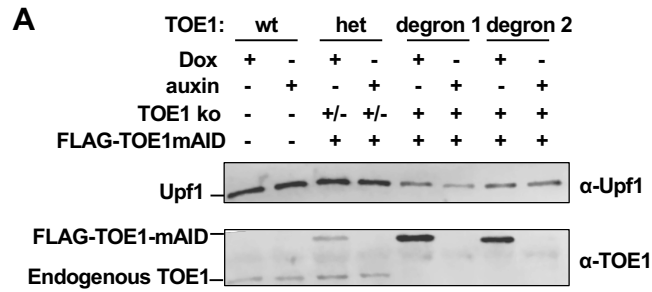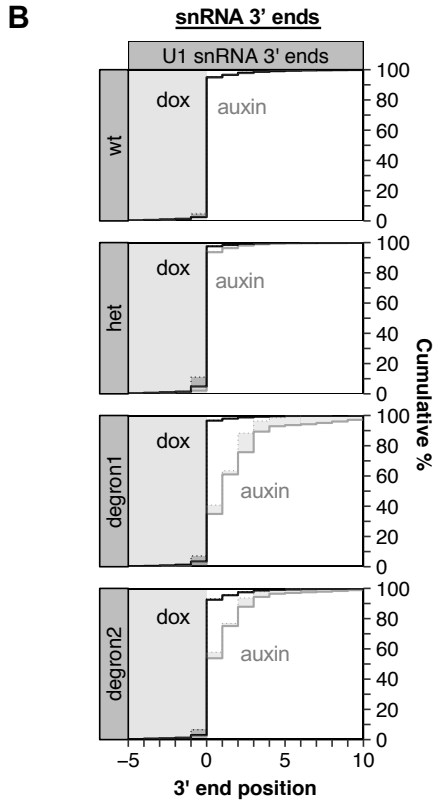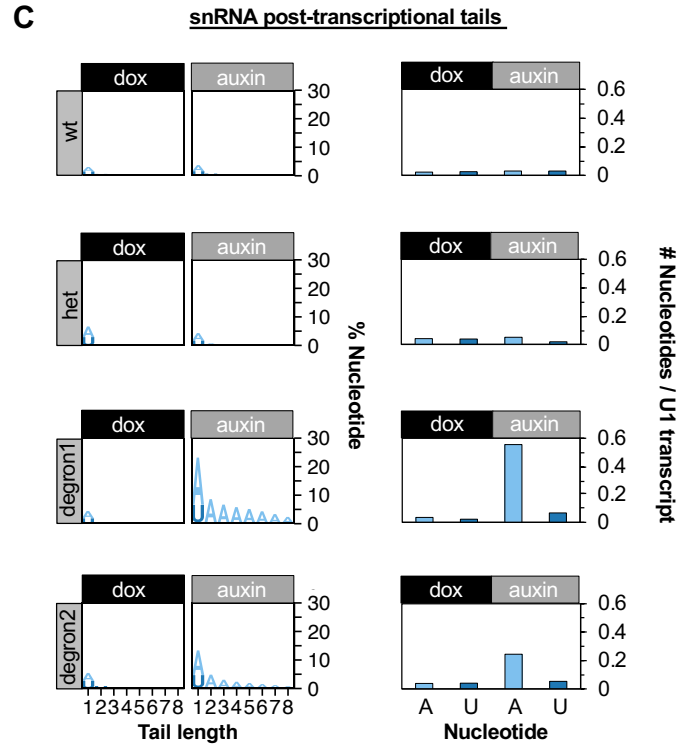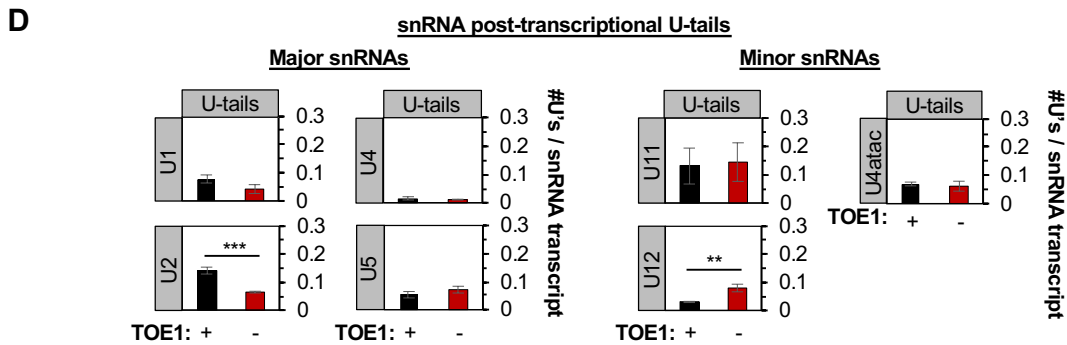

**Supplemental Figure S1 related to Figure 1. Characterization of TOE1-degron cell lines.**

**(A)** Western blot analysis of endogenous TOE1 and FLAG-TOE1-mAID levels in TOE1-degron cell lines treated with doxycycline (Dox) or auxin for 48 hours. Western blotting for Upf1 served as a loading control. Wt: parental cell line; Het: cell line expressing both endogenous TOE1 and exogenous FLAG-TOE1mAID; Degron 1 and 2: cell lines expressing exogenous FLAG-TOE1mAID with endogenous *TOE1* knocked out. Auxin treatment resulted in levels of FLAG-TOE1mAID below the limit of detection. **(B)** Cumulative plot of 3' ends of U1 snRNA harvested at steady state from wt, het, degron 1 and 2 cell lines described in (A), treated with doxycycline (black line) or auxin (gray line) for 48 hours. Position '0' refers to the mature 3' end of snRNAs indicated by the border between gray and white backgrounds. Only reads terminating at or downstream of position -5 are represented. Solid lines represent actual 3' end positions of snRNAs including any post-transcriptional nucleotides, while dotted lines represent the predicted 3' end of genome-encoded sequences with post-transcriptionally added nucleotides indicated by the shading between the lines. **(C)** Left panels: Sequence logo plots representing the percent of U1 snRNA with post-transcriptionally added nucleotides, broken down by nucleotide composition, for each cell line treated with doxycycline (black) or auxin (gray) for 48 hours. Right panels: average number of post-transcriptional adenosines and uridines per U1 snRNA transcript monitored by snRNA 3' end sequencing from indicated cell lines treated with doxycycline or auxin as indicated. **(D)** Average number of post-transcriptional uridines per snRNA transcript monitored by snRNA 3' end sequencing when TOE1 is present (black) or depleted (red) from the degron 1 cell line. Error bars: SEM from at least three independent experiments and p-values (Student's two-tailed t-test) \*\*:p<0.05; \*\*\*:p <0.01.

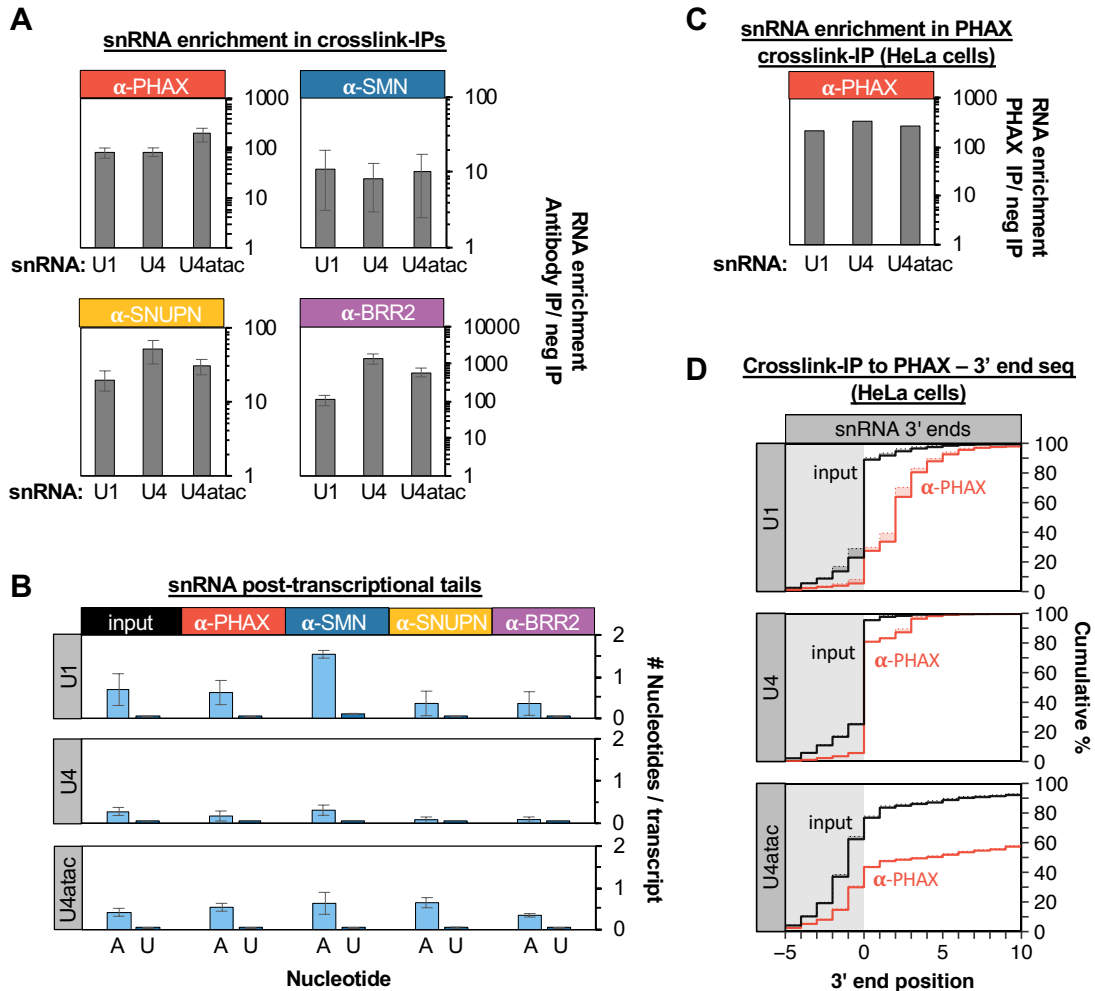

**Supplemental Figure S2 related to Figure 2. snRNAs are tailed and trimmed at early and late steps of snRNA biogenesis. (A)** Enrichment of U1, U4 and U4atac snRNAs in crosslinking and immunoprecipitation experiments with antibodies against PHAX, SMN, SNUPN, and BRR2 as measured by RT-qPCR and normalized to immunoprecipitation reactions with no antibody, with the latter condition set to 1. **(B)** Average number of post-transcriptionally added adenosines and uridines per snRNA transcript immunoprecipitated with indicated biogenesis factors. Input: snRNAs from cell lysates prior to immunoprecipitation. Error bars: SEM from at least three independent experiments. **(C)** Enrichment of U1, U4 and U4atac snRNAs in crosslinking and

immunoprecipitation experiments with antibodies against PHAX from HeLa cells as measured by RT-qPCR and normalized to immunoprecipitation reactions with no antibody, with the latter condition set to 1. **(D)** Cumulative plots of 3' end positions for snRNAs associated with snRNA biogenesis factor PHAX (red) from HeLa cells monitored by crosslinking and immunoprecipitation followed by snRNA 3' end sequencing. Input samples are shown in black. Only reads terminating at or downstream of position -5 are represented.

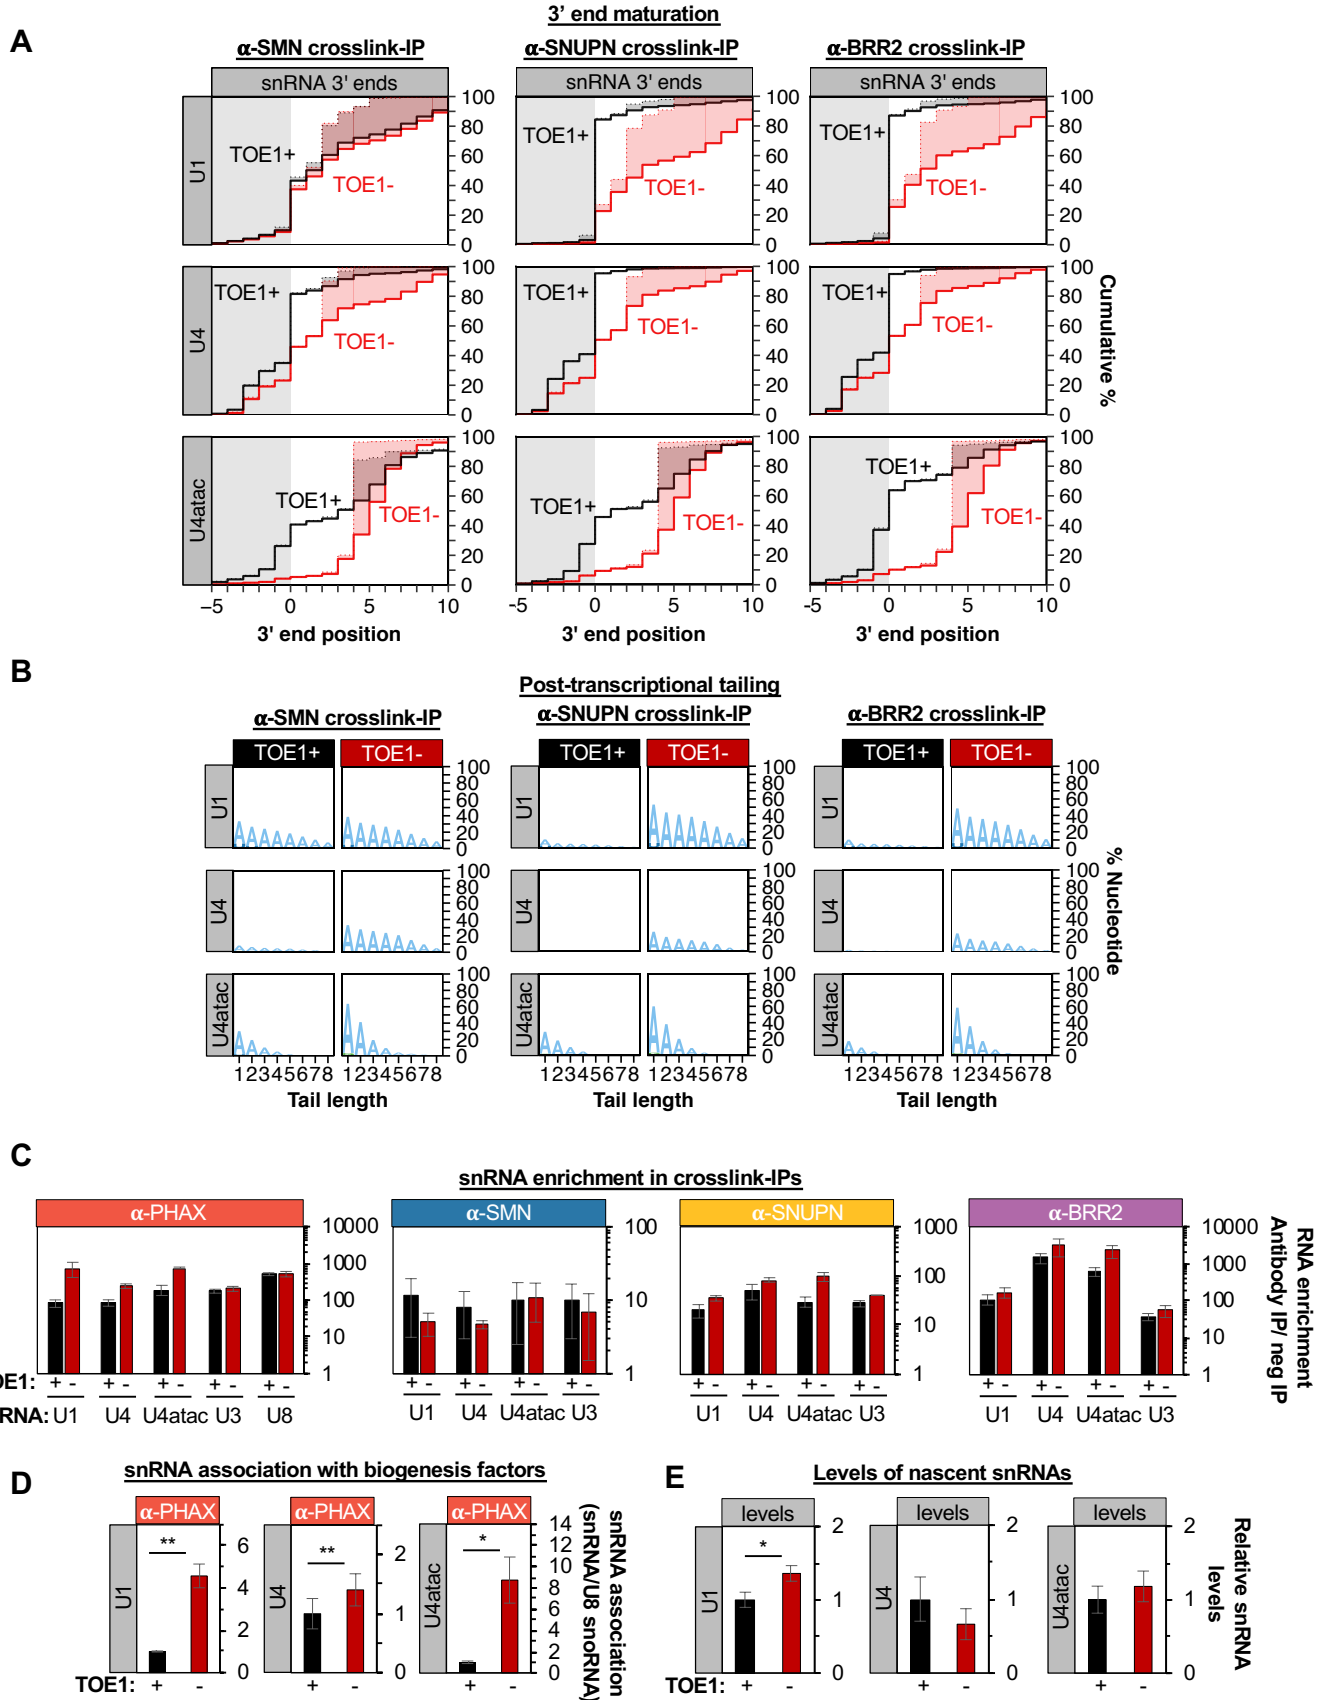

**Supplemental Figure S3 related to Figure 3. TOE1 depletion causes accumulation of unprocessed adenylated snRNAs with PHAX. (A)** Cumulative plots of 3' end positions of U1, U4 and U4atac snRNAs associated with SMN, SNUPN and BRR2 after crosslinking/immunoprecipitation and 3' end sequencing from cells with TOE1 present (black) or depleted (red). The average of three independent experiments is plotted. **(B)** Sequence logo plots representing the percent of snRNAs associated with SMN, SNUPN and BRR2 containing post-transcriptionally added tails, broken down by nucleotide composition, in the presence or absence of TOE1. The average of three independent experiments is plotted. **(C)** Enrichment of U1, U4, U4atac, U3 and U8 sn/snoRNAs in crosslinking and immunoprecipitation experiments using antibodies against PHAX, SMN, SNUPN, and BRR2 as measured by RT-qPCR and normalized to immunoprecipitation with no antibody, with the latter condition set to 1. Experiments were performed from cell lines with TOE1 present (black) or depleted (red). **(D)** Relative levels of U1, U4 and U4atac snRNAs associated with PHAX when TOE1 is present (black) or depleted (red) as measured by RT-qPCR assays normalized to the TOE1 non-target control U8 snoRNA, with averages of normalized U1, U4 and U4atac snRNA levels when TOE1 is present set to 1. **(E)** Relative levels of nascent U1, U4 and U4atac snRNAs in cells +/- TOE1, measured by RT-qPCR. Error bars: SEM from at least three independent experiments and p-values (Student's two-tailed t-test) \*:p<0.1; \*\*:p <0.05; \*\*\*:p <0.01.

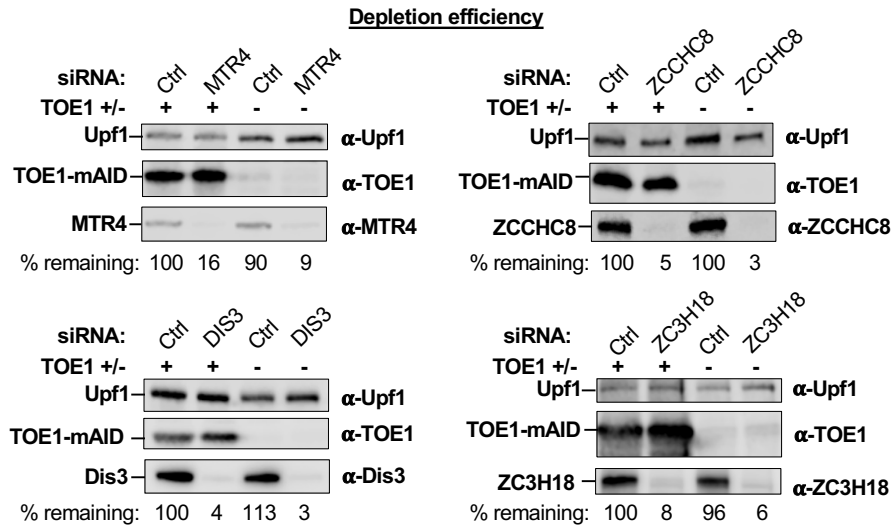

**Supplemental Figure S4 related to Figure 4. snRNAs become targets of the nuclear exosome in the absence of TOE1.** Representative Western blots showing co-depletions of MTR4, ZCCHC8, DIS3, and ZC3H18 with TOE1. Upf1 serves as an internal control for calculating percent remaining protein indicated below panels.



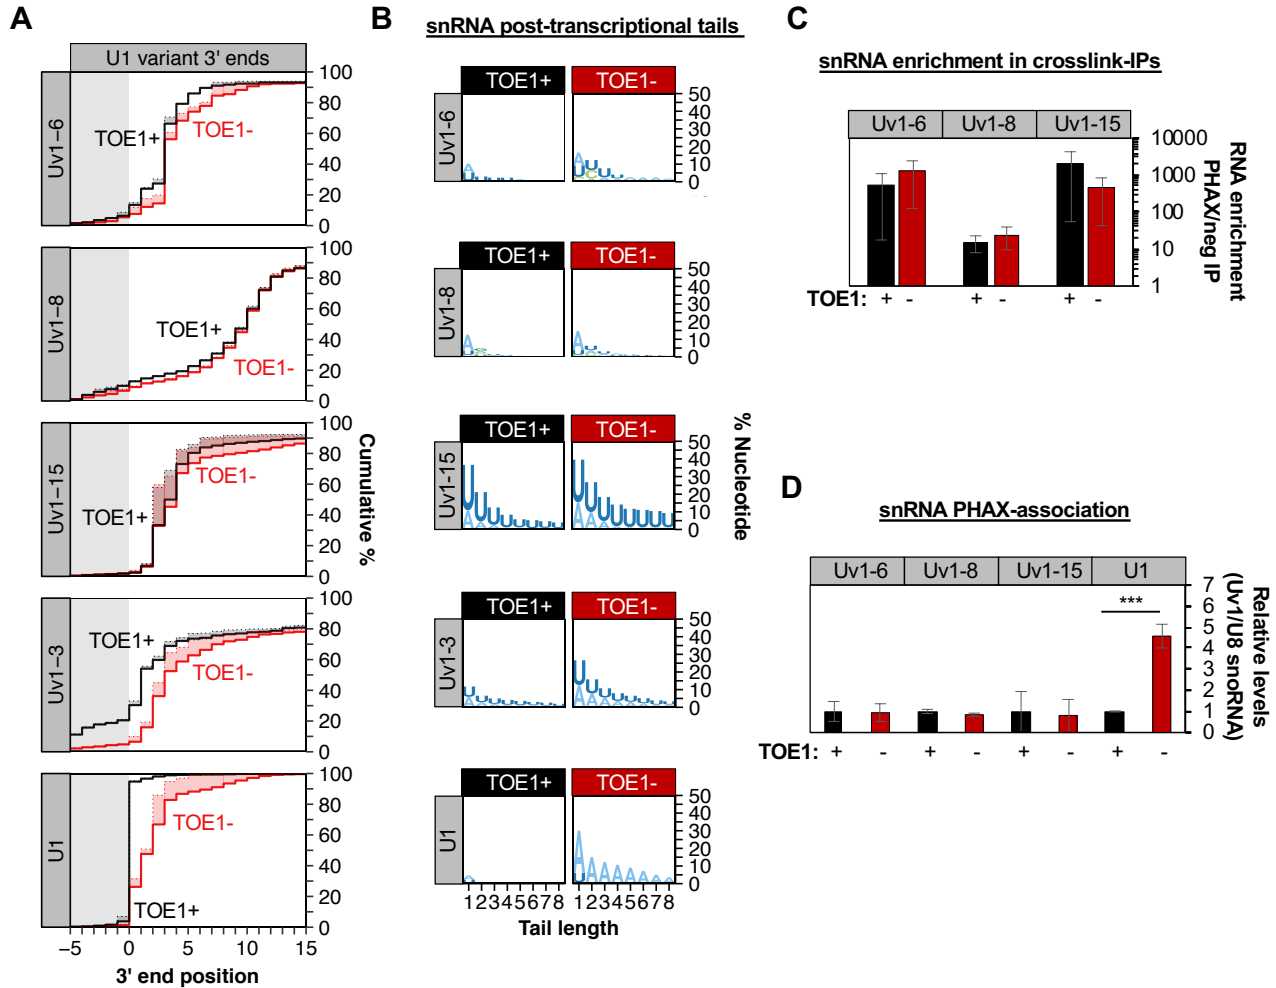

**Supplemental Figure S5 related to Figure 5. TOE1 selectively processes regular U1 snRNA over U1 snRNA variants. (A)** Cumulative plots of 3' ends of U1 variant snRNAs from RNA harvested at steady state when TOE1 is present (black) or depleted (red). The average of four independent experiments is plotted. **(B)** Sequence logo plots representing the percent U1 snRNA variants with post-transcriptionally added nucleotides when TOE1 is present or depleted, broken down by nucleotide composition. The average of four independent experiments is plotted. **(C)** Relative enrichment of snRNA variants with PHAX monitored by crosslinking/immunoprecipitation followed by RT-qPCR as normalized to immunoprecipitations with no antibody which was set to 1. **(D)** Relative levels of association of U1 variants with PHAX

when TOE1 is present (black) or depleted (red) as measured by RT-qPCR assays normalized to the TOE1 non-target control U8 snoRNA, with averages of normalized U1 variant snRNA levels when TOE1 is present set to 1. Error bars: SEM from three independent experiments and p-values (Student's two-tailed t-test) \*\*\*:p <0.01.

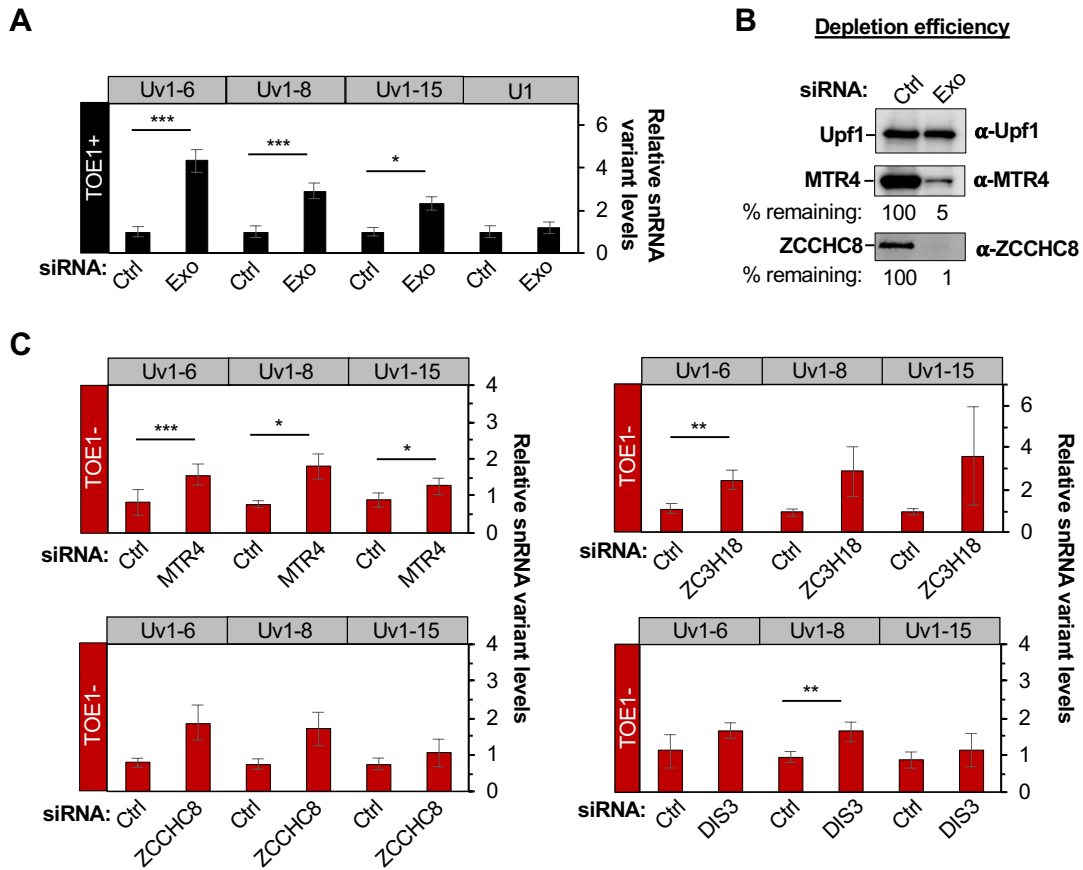

**Supplemental Figure S6 related to Figure 6. U1 variant snRNAs are targets of the nuclear exosome. (A)** Relative levels of variant U1 snRNAs upon siRNA-mediated co-depletion of MTR4 and ZCCHC8 as measured by RT-qPCR from total RNA and normalized to levels from control-treated (siCtrl) cells and to averages of 12S and 7SK RNA levels as internal controls. Error bars: SEM from four independent experiments and p-values (Student's two-tailed t-test) \*:p<0.1; \*\*:p<0.05; \*\*\*:p<0.01. **(B)** Representative western blots showing siRNA-mediated co-depletion of MTR4 and ZCCHC8. Upf1 is used as an internal control for calculating percent remaining protein. **(C)** Relative levels of U1 variant snRNAs upon TOE1 depletion and siRNA-mediated depletion of Ctrl and MTR4, ZCCHC8, ZC3H18, or DIS3 as measured by RT-qPCR from total RNA and normalized to levels in the Ctrl siRNA/TOE1+ condition shown in Figure 6 and to the averages of mitochondrial 12S and 7SK RNA levels as internal controls. Error bars: SEM from at least

three independent experiments and p-values (Student's two-tailed t-test) \*:p<0.1; \*\*:p <0.05;  
\*\*\*:p <0.01.

## Supplemental Table S1: RNA and DNA oligos used.

| RNA adapter                                                 | RNA sequence                                              |
|-------------------------------------------------------------|-----------------------------------------------------------|
| AG-10N                                                      | /5Phos/AGNNNNNNNNNAGAUCCGGAAGAGCGUCGUG/3SpC3/             |
| AG-11N                                                      | /5Phos/AGNNNNNNNNNAGAUCCGGAAGAGCGUCGUG/3SpC3/             |
| <b>gene specific primers for 3' end library preparation</b> |                                                           |
| FU1Vs-01                                                    | CAGACGTGTGCTCTCCGATCT ATCG ATGATCACGAAGGTGGTTTT           |
| FU1Vs-02                                                    | CAGACGTGTGCTCTCCGATCT GAACG ATGATCACGAAGGTGGTTTT          |
| FU1Vs-03                                                    | CAGACGTGTGCTCTCCGATCT GTTGTA ATGATCACGAAGGTGGTTTT         |
| FU1Vs-04                                                    | CAGACGTGTGCTCTCCGATCT CTACCAT ATGATCACGAAGGTGGTTTT        |
| FU1Vs-05                                                    | CAGACGTGTGCTCTCCGATCT TGGCTCA ATGATCACGAAGGTGGTTTT        |
| FU1Vs-06                                                    | CAGACGTGTGCTCTCCGATCT ACTACGTG ATGATCACGAAGGTGGTTTT       |
| FU1-Vs-07                                                   | CAGACGTGTGCTCTCCGATCT TCGTACACAG ATGATCACGAAGGTGGTTTT     |
| FU1-Vs-08                                                   | CAGACGTGTGCTCTCCGATCT CACAGTATGAC ATGATCACGAAGGTGGTTTT    |
| FU1-Vs-09                                                   | CAGACGTGTGCTCTCCGATCT ATGCTGACAAGT ATGATCACGAAGGTGGTTTT   |
| FU1-Vs-10                                                   | CAGACGTGTGCTCTCCGATCT GTC AAGTGTAGC ATGATCACGAAGGTGGTTTT  |
| FU1-Vs-11                                                   | CAGACGTGTGCTCTCCGATCT CAATGTACGAACGT ATGATCACGAAGGTGGTTTT |
| FU1-Vs-12                                                   | CAGACGTGTGCTCTCCGATCT TAGC ATGATCACGAAGGTGGTTTT           |
| FU1-Vs-13                                                   | CAGACGTGTGCTCTCCGATCT CTTGC ATGATCACGAAGGTGGTTTT          |
| FU1-Vs-14                                                   | CAGACGTGTGCTCTCCGATCT CAACAT ATGATCACGAAGGTGGTTTT         |
| FU1-Vs-15                                                   | CAGACGTGTGCTCTCCGATCT GATGGTA ATGATCACGAAGGTGGTTTT        |
| FU1-Vs-16                                                   | CAGACGTGTGCTCTCCGATCT ACCGAAGT ATGATCACGAAGGTGGTTTT       |
| FU1-Vs-17                                                   | CAGACGTGTGCTCTCCGATCT TGATGCACA ATGATCACGAAGGTGGTTTT      |
| FU1-Vs-18                                                   | CAGACGTGTGCTCTCCGATCT AGCATGTGTC ATGATCACGAAGGTGGTTTT     |
| FU1-Vs-19                                                   | CAGACGTGTGCTCTCCGATCT GTGTCATACTG ATGATCACGAAGGTGGTTTT    |
| FU1-Vs-20                                                   | CAGACGTGTGCTCTCCGATCT TACGACTGTTCA ATGATCACGAAGGTGGTTTT   |
| FU1-Vs-21                                                   | CAGACGTGTGCTCTCCGATCT CAGTTCACGATCG ATGATCACGAAGGTGGTTTT  |
| FU1-Vs-22                                                   | CAGACGTGTGCTCTCCGATCT GTTACATGCTTGCA ATGATCACGAAGGTGGTTTT |
| FU1-Vs-23                                                   | CAGACGTGTGCTCTCCGATCT TTCCA ATGATCACGAAGGTGGTTTT          |
| FU1-Vs-24                                                   | CAGACGTGTGCTCTCCGATCT AAGGTC ATGATCACGAAGGTGGTTTT         |
| FU1-Vs-25                                                   | CAGACGTGTGCTCTCCGATCT CCTTGAG ATGATCACGAAGGTGGTTTT        |
| FU1-Vs-26                                                   | CAGACGTGTGCTCTCCGATCT GGAACCTCG ATGATCACGAAGGTGGTTTT      |
| FU1-Vs-27                                                   | CAGACGTGTGCTCTCCGATCT ACCTG ATGATCACGAAGGTGGTTTT          |
| FU1-Vs-28                                                   | CAGACGTGTGCTCTCCGATCT TGGACC ATGATCACGAAGGTGGTTTT         |
| FU1-Vs-29                                                   | CAGACGTGTGCTCTCCGATCT CTTGAGC ATGATCACGAAGGTGGTTTT        |
| FU1-Vs-30                                                   | CAGACGTGTGCTCTCCGATCT GAATCTAC ATGATCACGAAGGTGGTTTT       |
| FU1-Vs-31                                                   | CAGACGTGTGCTCTCCGATCT TTGGC ATGATCACGAAGGTGGTTTT          |
| FU1-Vs-32                                                   | CAGACGTGTGCTCTCCGATCT AACTGGC ATGATCACGAAGGTGGTTTT        |
| FU1-Vs-33                                                   | CAGACGTGTGCTCTCCGATCT CAACCGAT ATGATCACGAAGGTGGTTTT       |
| FU1-Vs-34                                                   | CAGACGTGTGCTCTCCGATCT GTTGAATC ATGATCACGAAGGTGGTTTT       |
| FU1-Vs-35                                                   | CAGACGTGTGCTCTCCGATCT CCGGA ATGATCACGAAGGTGGTTTT          |
| FU1-Vs-36                                                   | CAGACGTGTGCTCTCCGATCT TCTCTA ATGATCACGAAGGTGGTTTT         |
| FU4-01                                                      | CAGACGTGTGCTCTCCGATCT CGTA GCAGTATCGTAGCCAATGAGG          |
| FU4-02                                                      | CAGACGTGTGCTCTCCGATCT CGTTC GCAGTATCGTAGCCAATGAGG         |
| FU4-03                                                      | CAGACGTGTGCTCTCCGATCT TACAAC GCAGTATCGTAGCCAATGAGG        |
| FU4-04                                                      | CAGACGTGTGCTCTCCGATCT ATGGTAG GCAGTATCGTAGCCAATGAGG       |
| FU4-05                                                      | CAGACGTGTGCTCTCCGATCT TGATGGCA GCAGTATCGTAGCCAATGAGG      |
| FU4-06                                                      | CAGACGTGTGCTCTCCGATCT ACACGTTGT GCAGTATCGTAGCCAATGAGG     |
| FU4atac-01                                                  | CAGACGTGTGCTCTCCGATCT ACCAC CCATCTTTTTCTTGAGGTTGCAC       |
| FU4atac-02                                                  | CAGACGTGTGCTCTCCGATCT GCACCTA CCATCTTTTTCTTGAGGTTGCAC     |
| FU4atac-03                                                  | CAGACGTGTGCTCTCCGATCT GTGACTA CCATCTTTTTCTTGAGGTTGCAC     |
| FU4atac-04                                                  | CAGACGTGTGCTCTCCGATCT TTTCTTA CCATCTTTTTCTTGAGGTTGCAC     |
| FU4atac-05                                                  | CAGACGTGTGCTCTCCGATCT CACGT CCATCTTTTTCTTGAGGTTGCAC       |
| FU4atac-06                                                  | CAGACGTGTGCTCTCCGATCT TTAATA CCATCTTTTTCTTGAGGTTGCAC      |
| FU2-01                                                      | CAGACGTGTGCTCTCCGATCT TACG GGAGATGGAATAGGAGCTTGC          |
| FU2-02                                                      | CAGACGTGTGCTCTCCGATCT CTGCT GGAGATGGAATAGGAGCTTGC         |
| FU2-03                                                      | CAGACGTGTGCTCTCCGATCT CAATCA GGAGATGGAATAGGAGCTTGC        |
| FU2-04                                                      | CAGACGTGTGCTCTCCGATCT GTAGATG GGAGATGGAATAGGAGCTTGC       |
| FU2-05                                                      | CAGACGTGTGCTCTCCGATCT AGCCATAG GGAGATGGAATAGGAGCTTGC      |
| FU2-06                                                      | CAGACGTGTGCTCTCCGATCT TGTACAGCA GGAGATGGAATAGGAGCTTGC     |
| FU2-07                                                      | CAGACGTGTGCTCTCCGATCT TCGG GGAGATGGAATAGGAGCTTGC          |
| FU2-08                                                      | CAGACGTGTGCTCTCCGATCT CGACA GGAGATGGAATAGGAGCTTGC         |
| FU2-09                                                      | CAGACGTGTGCTCTCCGATCT CATTGA GGAGATGGAATAGGAGCTTGC        |
| FU2-10                                                      | CAGACGTGTGCTCTCCGATCT CGGAAGT GGAGATGGAATAGGAGCTTGC       |
| FU2-11                                                      | CAGACGTGTGCTCTCCGATCT ACTAGTCA GGAGATGGAATAGGAGCTTGC      |
| FU2-12                                                      | CAGACGTGTGCTCTCCGATCT TGAAGCATA GGAGATGGAATAGGAGCTTGC     |
| FU5-04                                                      | CAGACGTGTGCTCTCCGATCT GATGGTA ATACTCTGGTTTCTTTCAGATCG     |
| FU5-05                                                      | CAGACGTGTGCTCTCCGATCT ACCGAAGT ATACTCTGGTTTCTTTCAGATCG    |
| FU5-06                                                      | CAGACGTGTGCTCTCCGATCT TGATGCACA ATACTCTGGTTTCTTTCAGATCG   |
| FU5-07                                                      | CAGACGTGTGCTCTCCGATCT GACATTCGTA ATACTCTGGTTTCTTTCAGATCG  |
| FU5-08                                                      | CAGACGTGTGCTCTCCGATCT ATGGACTAGTA ATACTCTGGTTTCTTTCAGATCG |
| FU5-09                                                      | CAGACGTGTGCTCTCCGATCT ATCATG ATACTCTGGTTTCTTTCAGATCG      |
| FU5-10                                                      | CAGACGTGTGCTCTCCGATCT TAGCATG ATACTCTGGTTTCTTTCAGATCG     |
| FU11-01                                                     | CAGACGTGTGCTCTCCGATCT GATC CGACATCAAGAGATTTCCGGAAGC       |
| FU11-02                                                     | CAGACGTGTGCTCTCCGATCT TGAAG CGACATCAAGAGATTTCCGGAAGC      |
| FU11-03                                                     | CAGACGTGTGCTCTCCGATCT CTATAC CGACATCAAGAGATTTCCGGAAGC     |
| FU11-04                                                     | CAGACGTGTGCTCTCCGATCT ACGACTG CGACATCAAGAGATTTCCGGAAGC    |
| FU11-05                                                     | CAGACGTGTGCTCTCCGATCT TCATGACA CGACATCAAGAGATTTCCGGAAGC   |
| FU11-06                                                     | CAGACGTGTGCTCTCCGATCT AGTCAGTTG CGACATCAAGAGATTTCCGGAAGC  |
| FU12-01                                                     | CAGACGTGTGCTCTCCGATCT CTAG CGAATCCTCACTGCTAATGTGAG        |
| FU12-02                                                     | CAGACGTGTGCTCTCCGATCT ACTTC CGAATCCTCACTGCTAATGTGAG       |
| FU12-03                                                     | CAGACGTGTGCTCTCCGATCT GATATG CGAATCCTCACTGCTAATGTGAG      |
| FU12-04                                                     | CAGACGTGTGCTCTCCGATCT TGCTGAC CGAATCCTCACTGCTAATGTGAG     |
| FU12-05                                                     | CAGACGTGTGCTCTCCGATCT AGTACTGT CGAATCCTCACTGCTAATGTGAG    |
| FU12-06                                                     | CAGACGTGTGCTCTCCGATCT TCAGTCAAC CGAATCCTCACTGCTAATGTGAG   |
| FU3-01                                                      | CAGACGTGTGCTCTCCGATCT TACA CTCTGAACGTGTAGAGCAC            |
| FU3-02                                                      | CAGACGTGTGCTCTCCGATCT ATGTA CTCTGAACGTGTAGAGCAC           |
| FU3-03                                                      | CAGACGTGTGCTCTCCGATCT GCACGA CTCTGAACGTGTAGAGCAC          |

## Supplemental Table S1: RNA and DNA oligos used.

|                                      |                                                                   |
|--------------------------------------|-------------------------------------------------------------------|
| FU3-04                               | CAGACGTGTGCTCTCCGATCT AGTGCTA CTCTGAACGTGTAGAGCAC                 |
| FU3-05                               | CAGACGTGTGCTCTCCGATCT CAACTCGA CTCTGAACGTGTAGAGCAC                |
| FU3-06                               | CAGACGTGTGCTCTCCGATCT TCTTGATA CTCTGAACGTGTAGAGCAC                |
| FU8-01                               | CAGACGTGTGCTCTCCGATCT AATC GGATAATCCTTACCTGTTCTCC                 |
| FU8-02                               | CAGACGTGTGCTCTCCGATCT TTCGA GGATAATCCTTACCTGTTCTCC                |
| FU8-03                               | CAGACGTGTGCTCTCCGATCT CCAAAA GGATAATCCTTACCTGTTCTCC               |
| FU8-04                               | CAGACGTGTGCTCTCCGATCT GGTTTTG GGATAATCCTTACCTGTTCTCC              |
| FU1V68-01                            | CAGACGTGTGCTCTCCGATCT ATGC TTCCCCAAATGTGGGAA                      |
| FU1V68-02                            | CAGACGTGTGCTCTCCGATCT GACGA TTCCCCAAATGTGGGAA                     |
| FU1V68-03                            | CAGACGTGTGCTCTCCGATCT GTTAGT TTCCCCAAATGTGGGAA                    |
| FU1V68-04                            | CAGACGTGTGCTCTCCGATCT CATCTAC TTCCCCAAATGTGGGAA                   |
| FU1V68-05                            | CAGACGTGTGCTCTCCGATCT TCGGTATC TTCCCCAAATGTGGGAA                  |
| FU1V68-06                            | CAGACGTGTGCTCTCCGATCT ACATGTCGT TTCCCCAAATGTGGGAA                 |
| FUv1-6-01                            | CAGACGTGTGCTCTCCGATCT AGGA TGGCAGGAGAGATACCCTGG                   |
| FUv1-6-02                            | CAGACGTGTGCTCTCCGATCT TGGT TGGCAGGAGAGATACCCTGG                   |
| FUv1-6-03                            | CAGACGTGTGCTCTCCGATCT ACACA TGGCAGGAGAGATACCCTGG                  |
| FUv1-6-04                            | CAGACGTGTGCTCTCCGATCT GACGA TGGCAGGAGAGATACCCTGG                  |
| FUv1-6-05                            | CAGACGTGTGCTCTCCGATCT CCAATT TGGCAGGAGAGATACCCTGG                 |
| FUv1-6-06                            | CAGACGTGTGCTCTCCGATCT GGAATA TGGCAGGAGAGATACCCTGG                 |
| FUv1-3-01                            | CAGACGTGTGCTCTCCGATCT TGTG ATACTTATGTTTATCTGGCAGAAGAA             |
| FUv1-3-02                            | CAGACGTGTGCTCTCCGATCT CACG ATACTTATGTTTATCTGGCAGAAGAA             |
| FUv1-3-03                            | CAGACGTGTGCTCTCCGATCT GCCAT ATACTTATGTTTATCTGGCAGAAGAA            |
| FUv1-3-04                            | CAGACGTGTGCTCTCCGATCT ATACG ATACTTATGTTTATCTGGCAGAAGAA            |
| FUv1-3-05                            | CAGACGTGTGCTCTCCGATCT TTACCG ATACTTATGTTTATCTGGCAGAAGAA           |
| FUv1-3-06                            | CAGACGTGTGCTCTCCGATCT AATGGC ATACTTATGTTTATCTGGCAGAAGAA           |
| FUv1-15-01                           | CAGACGTGTGCTCTCCGATCT AAGG ATCCGTTATGTTCCGGATGTA                  |
| FUv1-15-02                           | CAGACGTGTGCTCTCCGATCT TTCC ATCCGTTATGTTCCGGATGTA                  |
| FUv1-15-03                           | CAGACGTGTGCTCTCCGATCT GGTTA ATCCGTTATGTTCCGGATGTA                 |
| FUv1-15-04                           | CAGACGTGTGCTCTCCGATCT CCAAT ATCCGTTATGTTCCGGATGTA                 |
| FUv1-15-05                           | CAGACGTGTGCTCTCCGATCT GAGTCT ATCCGTTATGTTCCGGATGTA                |
| FUv1-15-06                           | CAGACGTGTGCTCTCCGATCT ACAGTG ATCCGTTATGTTCCGGATGTA                |
| FUv1-8-03                            | CAGACGTGTGCTCTCCGATCT CAGTTG CCTAGCAGAAGAAAATCGTGTTCACG           |
| FUv1-8-04                            | CAGACGTGTGCTCTCCGATCT TCCAAAT CCTAGCAGAAGAAAATCGTGTTCACG          |
| FUv1-8-05                            | CAGACGTGTGCTCTCCGATCT ATTCCAAT CCTAGCAGAAGAAAATCGTGTTCACG         |
| FUv1-8-06                            | CAGACGTGTGCTCTCCGATCT GATTGGCCT CCTAGCAGAAGAAAATCGTGTTCACG        |
| <b>library prep and sequencing</b>   |                                                                   |
| AR-17                                | ACACGACGCTCTCCGA                                                  |
| PCR_F_D501                           | AATGATACGGCGACCACCGAGATCTACACTATAGCCTACACTCTTTCCCTACACGACGCTCTT   |
| PCR_F_D502                           | AATGATACGGCGACCACCGAGATCTACACATAGAGGCACACTCTTTCCCTACACGACGCTCT    |
| PCR_F_D503                           | AATGATACGGCGACCACCGAGATCTACACCTATCCCTACACTCTTTCCCTACACGACGCTCTT   |
| PCR_F_D701                           | CAAGCAGAAGACGGCATACGAGATCGAGTAATGTGACTGGAGTTCAGACGTGTGCTCTTCCG/   |
| PCR_F_D702                           | CAAGCAGAAGACGGCATACGAGATCTCCGGAGTGAAGTTCAGAGTTCAGACGTGTGCTCTTCCG/ |
| PCR_F_D703                           | CAAGCAGAAGACGGCATACGAGATAATGAGCGGTGACTGGAGTTCAGACGTGTGCTCTTCCG/   |
| PCR_F_D704                           | CAAGCAGAAGACGGCATACGAGATCGAATTCCTGACTGGAGTTCAGACGTGTGCTCTTCCG/    |
| PCR_F_D705                           | CAAGCAGAAGACGGCATACGAGATTTCTGAATGTGACTGGAGTTCAGACGTGTGCTCTTCCG/   |
| PCR_F_D706                           | CAAGCAGAAGACGGCATACGAGATCGAATTCCTGACTGGAGTTCAGACGTGTGCTCTTCCG/    |
| <b>gRNAs</b>                         |                                                                   |
| CAF1Z_gRNA1                          | GACACCACCTGGGGTTAGG                                               |
| CAF1Z_gRNA2                          | TGCTTTTGCTGACACCACCT                                              |
| CAF1Z_gRNA3                          | GCTGTGGACACGGTGAGAGT                                              |
| <b>primers - endogenous knockout</b> |                                                                   |
| caf1z_seq_F1                         | ACGTGGGTTACAAAGGCTT                                               |
| caf1z_seq_F2                         | GCTTGTGGGAAAAGCTACCA                                              |
| caf1z_seq_R1                         | TTACGCAAACTCTTCCGTGCC                                             |
| caf1z_seq_R2                         | ACCTACCCACAGGAGCTGAG                                              |
| <b>siRNAs</b>                        |                                                                   |
| siControl (siLuciferase)             | CGUACGCGGAAUACUUGCAUU                                             |
| siMTR4                               | CAAUUAAGGCUUGAGUAAUU                                              |
| siZCCHC8                             | GGAAUGUACCUAGGUAUUUU                                              |
| siZC3H18                             | GGAAUGAAUUGUAGGUUUUUU                                             |
| siDIS3                               | AGGUAGAGUUGUAGGAAUUUU                                             |
| <b>qPCR primers</b>                  |                                                                   |
| U1-forward                           | GCACTCCGGATGTGCTGACCC                                             |
| U1-reverse                           | CAGGGGAAAGCGCGAACGCGAG                                            |
| U4-forward                           | GCGCGATTATTGCTAATTGAAA                                            |
| U4-reverse                           | AAAAATTGCCAATGCCGACTA                                             |
| U4atac-forward                       | GCGCATAGTGAGGGCAGTACT                                             |
| U4atac-reverse                       | GCACCAAATAAAGCAAAGCTCTA                                           |
| 7sk-forward                          | GAGGGCGATCTGGCTGCGACAT                                            |
| 7sk-reverse                          | ACATGGAGCGGTGAGGGAGGAA                                            |
| 12s-forward                          | ATGCAGCTCAAAACGCTTAGC                                             |
| 12s-reverse                          | GCTGGCACGAAATTGACCAA                                              |
| Uv1-6-forward                        | TGGCAGGAGAGATACCCTGG                                              |
| Uv1-6-reverse                        | CGCGAATGCAGTCTACCACTG                                             |
| Uv1-8-forward                        | GAAGCTAATTCGTGCAACTTCCC                                           |
| Uv1-8-reverse                        | CGGGGAAAAGAGCGAACGCGAG                                            |
| Uv1-15-forward                       | GTTATGTTCCGGGTGACTGACCCCTGCC                                      |
| Uv1-15-reverse                       | CAGTCGAGTTCTCCACATTG                                              |
| U3-forward                           | AGAGGTAGCGTTTTCTCCTGAGCG                                          |
| U3-reverse                           | ACCACTCAGACCGGCTTCTC                                              |
| U8-forward                           | CGTCAGGTGGGATAATCCTT                                              |
| U8-reverse                           | GGGTGTGCAAGTCTGATT                                                |
